# Supplementary material for: The Interaction of the Flavonoid Fisetin with Human Glutathione Transferase A1-1
Source: PubMed Central journal article supplement (PMC8004991; doi:10.3390/metabo11030190), 2021-03-23
Supplement: metabolites-11-00190-s001.pdf [file metabolites-11-00190-s001.pdf]

### Supplementary Table S1

List of the primers used for RT-qPCR analysis of the selected genes.

| <b>Gene</b>     | <b>Forward Primer</b>    | <b>Reverse Primer</b>   |
|-----------------|--------------------------|-------------------------|
| Target gene     |                          |                         |
| <i>GSTA1/2</i>  | GTGCAGACCAGAGCCATTC      | TCACCCAAATCTGCTATACCTTC |
| Reference genes |                          |                         |
| <i>B2M</i>      | TGCTGTCTCCATGTTTGATGTATC | TCTCTGCTCCCCACCTCTAAG   |
| <i>GAPDH</i>    | GAGTCCACTGGCGTCTTCAC     | GAGGCATTGCTGATGATCTTGAG |
